# Supplementary material
Source: PubMed Central journal article supplement (PMC6800648)
Supplement: NIHMS1537978-supplement-3.pdf [file NIHMS1537978-supplement-3.pdf]

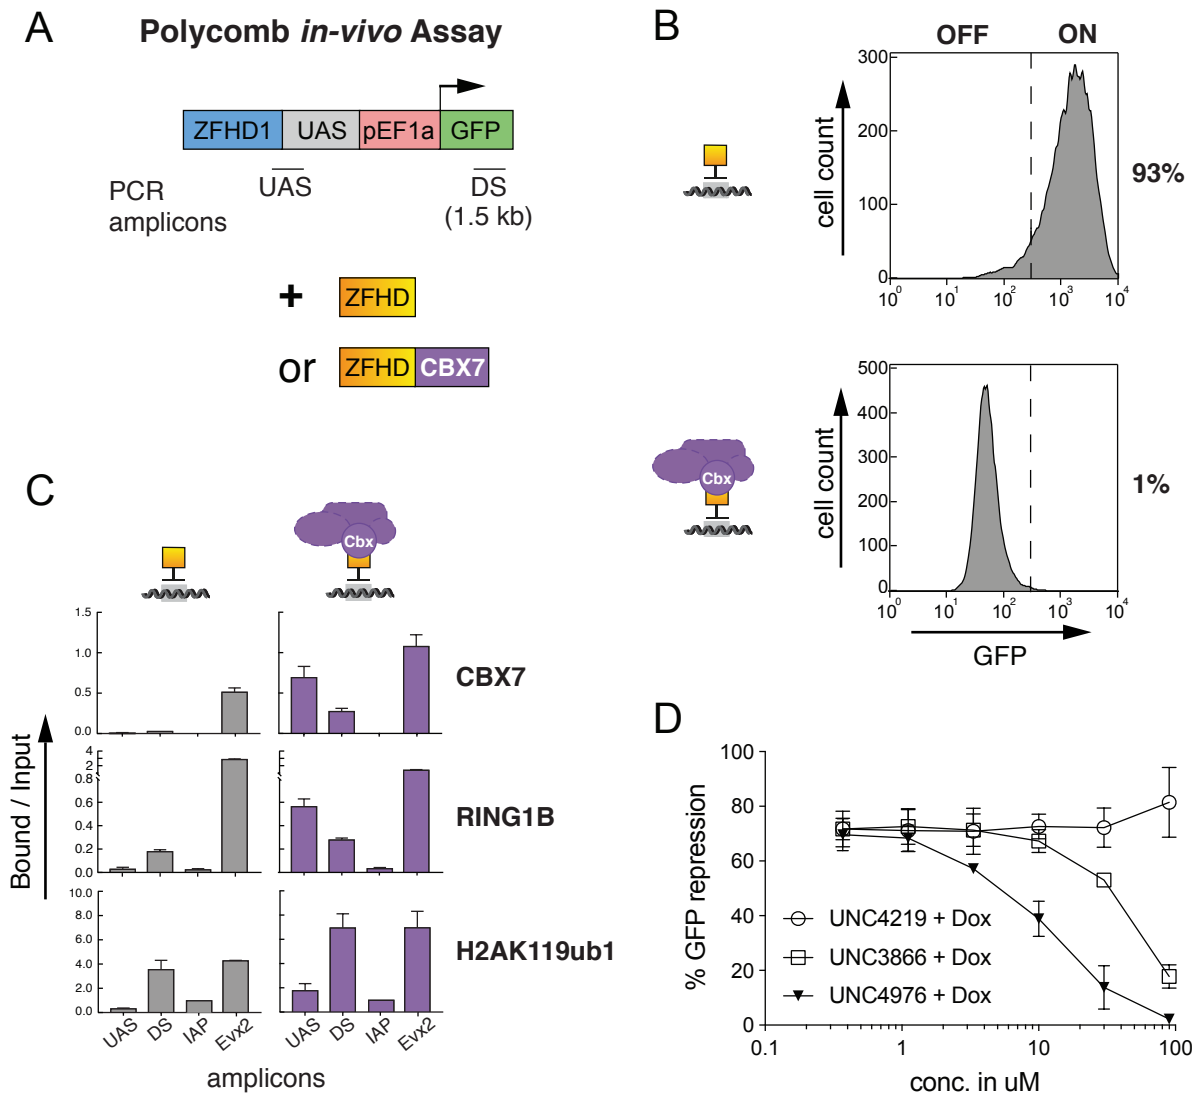

**Figure 1. Design and readout of Polycomb *in-vivo* Assay. Related to Figure 1. A.** An array of DNA binding sites including 12 x ZFHD1 and 4 x Gal4 UAS are located upstream of an EF1alpha promoter controlling constitutive expression of a GFP reporter gene. 12 x ZFHD1 DNA binding sites facilitate recruitment of ZFHD1 alone or as a chimeric fusion with human CBX7. **B.** Flow cytometry histogram shows GFP expression in response to expression of ZFHD1 alone (top) or ZFHD1-CBX7 fusion (bottom). Percentage indicates fraction of GFP-positive reporter mESCs. **C.** ChIP-qPCR analysis shows relative enrichment (Bound/Input) of CBX7, RING1B and H2AK119ub1 in response to ZFHD1 alone or ZFHD1-CBX7 tethering. ChIP-qPCR for H2AK119ub1 is normalized to IAP. IAP serves as negative control and Evx2 as positive control. **D.** Small molecule antagonism of propagation of Polycomb-mediated silencing in a separate TetOFF reporter cell line (Moussa et al., 2019). Treatment with control compound (UNC4219) does not impair maintenance of CBX7-induced GFP reporter gene silencing. In contrast, heritable silencing after Dox-induced TetR-CBX7 release is decreased in response to UNC3866 or UNC4976. Percentage of cells maintaining GFP silencing after six days of Dox treatment in response to increasing concentrations of CBX7 antagonists (UNC3866, UNC4976) or control compound (UNC4219). Data in **C** and **D** are presented as mean  $\pm$  SD from two replicate experiments.

| Isothermal Titration Calorimetry (ITC) Affinity Data |                                     |                                     |
|------------------------------------------------------|-------------------------------------|-------------------------------------|
| Protein                                              | UNC3866 ITC $K_d$ ( $\mu\text{M}$ ) | UNC4976 ITC $K_d$ ( $\mu\text{M}$ ) |
| CBX2                                                 | 1.800 $\pm$ 0.210 (n=2)             | 1.665 $\pm$ 0.177 (n=2)             |
| CBX4                                                 | 0.094 $\pm$ 0.017 (n=2)             | 0.062 $\pm$ 0.004 (n=2)             |
| CBX6                                                 | 0.610 $\pm$ 0.008 (n=2)             | 0.561 $\pm$ 0.175 (n=2)             |
| CBX7                                                 | 0.097 $\pm$ 0.003 (n=2)             | 0.059 $\pm$ 0.018 (n=4)             |
| CBX8                                                 | 1.200 $\pm$ 0.021 (n=2)             | n.d.*                               |
| CDYL2                                                | 0.850 $\pm$ 0.076 (n=2)             | 0.459 $\pm$ 0.123 (n=2)             |

**Table 1. ITC Data Comparison for UNC3866 and UNC4976. Related to Figure 1.** Data are presented as mean  $\pm$  SD from at least two replicate experiments (n), \*not stable in presence of DMSO required for UNC4976 solubilization.

| Surface Plasmon Resonance (SPR) Kinetic Data |                                        |                     |
|----------------------------------------------|----------------------------------------|---------------------|
| <b>CBX2</b>                                  |                                        |                     |
|                                              | Residence Time (1/k <sub>d</sub> ) (s) | K <sub>d</sub> (nM) |
| UNC4195                                      | 53.2                                   | 1020.0              |
| UNC5355                                      | 34.4                                   | 1750.0              |
| <b>CBX4</b>                                  |                                        |                     |
|                                              | Residence Time (1/k <sub>d</sub> ) (s) | K <sub>d</sub> (nM) |
| UNC4195                                      | 46.7                                   | 28.3                |
| UNC5355                                      | 50.3                                   | 26.7                |
| <b>CBX6</b>                                  |                                        |                     |
|                                              | Residence Time (1/k <sub>d</sub> ) (s) | K <sub>d</sub> (nM) |
| UNC4195                                      | 14.5                                   | 642.0               |
| UNC5355                                      | 15.5                                   | 543.0               |
| <b>CBX7</b>                                  |                                        |                     |
|                                              | Residence Time (1/k <sub>d</sub> ) (s) | K <sub>d</sub> (nM) |
| UNC4195                                      | 56.2                                   | 42.0                |
| UNC5355                                      | 46.1                                   | 53.8                |
| <b>CBX8</b>                                  |                                        |                     |
|                                              | Residence Time (1/k <sub>d</sub> ) (s) | K <sub>d</sub> (nM) |
| UNC4195                                      | 28.0                                   | 415.0               |
| UNC5355                                      | 27.4                                   | 458.0               |
| <b>CDYL2</b>                                 |                                        |                     |
|                                              | Residence Time (1/k <sub>d</sub> ) (s) | K <sub>d</sub> (nM) |
| UNC4195                                      | 8.3                                    | 698.0               |
| UNC5355                                      | 14.2                                   | 415.0               |

**Table 2. SPR Data Comparison for biotinylated UNC3866 (UNC4195) and UNC4976 (UNC5355). Related to Figure 1.** For each of the six chromodomains tested, residence time is reported as the inverse of the off-rate ( $k_d$ ) and kinetic dissociation constants ( $K_d$ 's) are reported and calculated from both kinetic on-rates ( $k_a$ ) and off-rates ( $k_d$ ) ( $K_d = k_d/k_a$ ).

### A CBX2-UNC4976

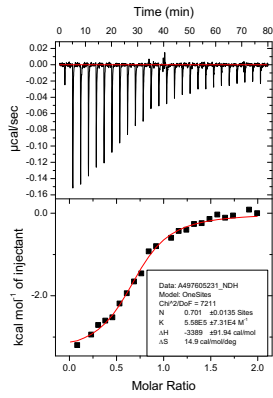

### B CBX4-UNC4976

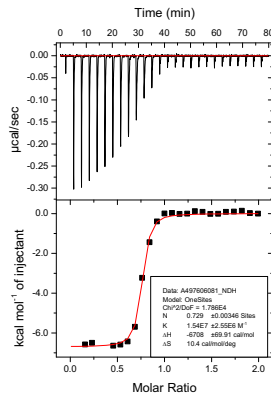

### C CBX6-UNC4976

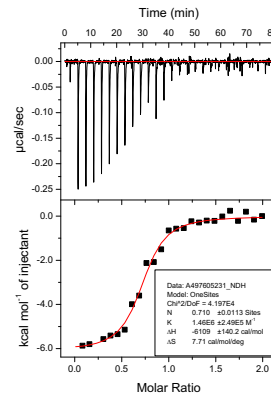

### D CBX7-UNC4976

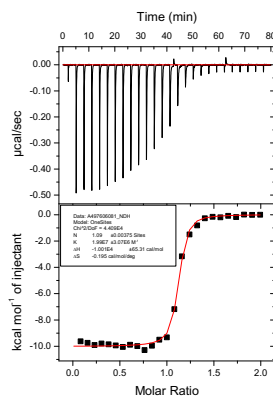

### E CDYL2-UNC4976

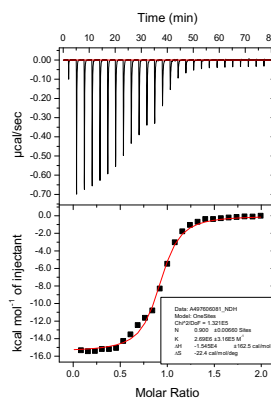

### F CBX7-UNC5355

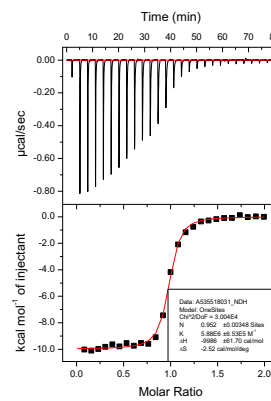

### G

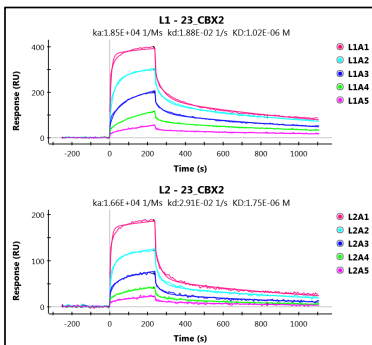

### H

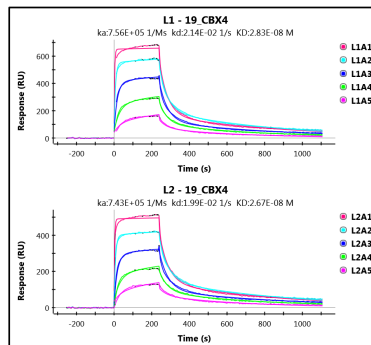

### I

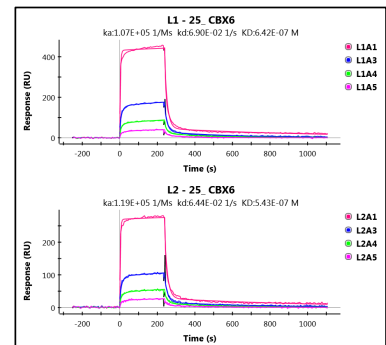

### J

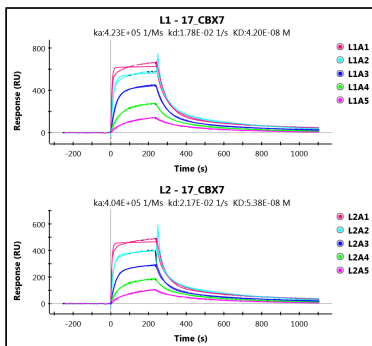

### K

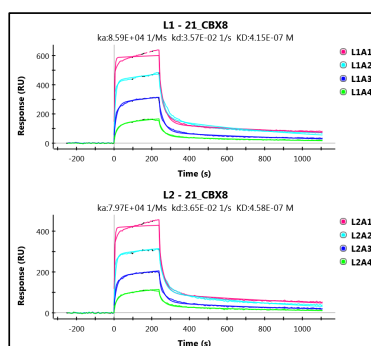

### L

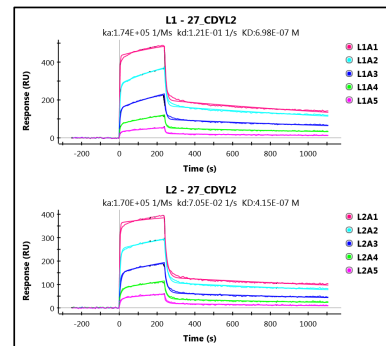

**Figure 2. Representative Data from Biophysical Experiments. Related to Figure 1. A-F.** Representative Isothermal Titration Calorimetry (ITC) curves for all chromodomains tested with UNC4976 (**A-E**), and CBX7 tested with UNC5355 (**F**). **G-L.** Surface Plasmon Resonance (SPR) Sensorgrams from Kinetic Experiments. Sensorgrams for CBX2 (**G**), CBX4 (**H**), CBX6 (**I**), CBX7 (**J**), CBX8 (**K**), and CDYL2 (**L**) are shown. For each protein, UNC4195 data is shown on the top sensorgram and UNC5355 data is shown on the bottom sensorgram.

**A**

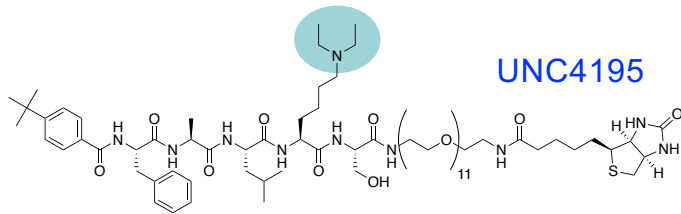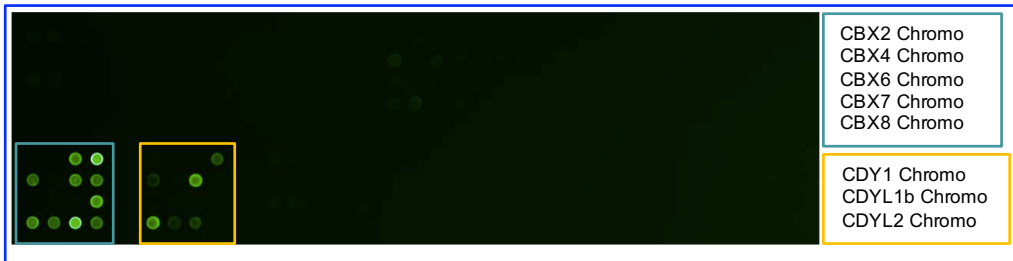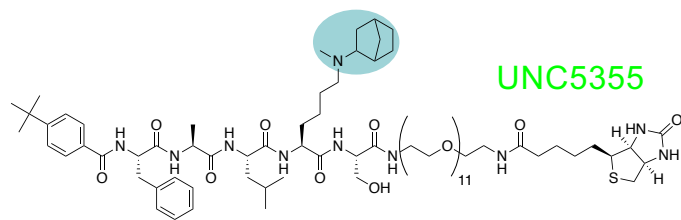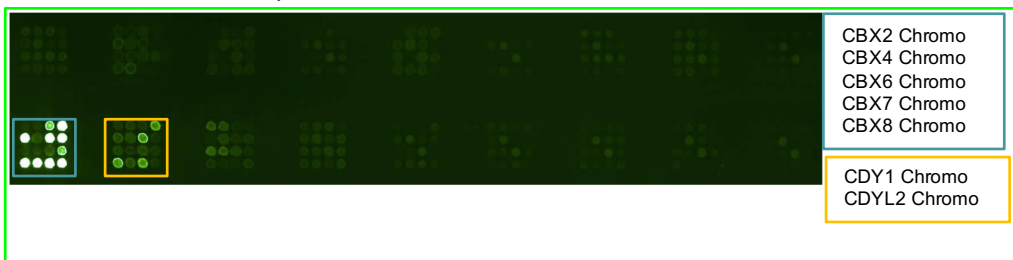

**B**

Biomatik Full Array 3

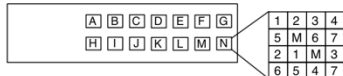

| TUDOR           | TUDOR       | TUDOR        | TUDOR       | TUDOR           | TUDOR+PHD    | PHD            |
|-----------------|-------------|--------------|-------------|-----------------|--------------|----------------|
| A1) 53BP1(1-2)  | B1) TDRD4-1 | C1) TDRD8    | D1) AKAP1   | E1) SETD81      | F1) JMJ202   | G1) ING2       |
| A2) 53BP1(1-2)' | B2) TDRD4-3 | C2) TDRD9    | D2) LER     | E2) SMN         | F2) JMJ202C  | G2) TAF3       |
| A3) TDRD1-2     | B3) TDRD4-4 | C3) TDRD10   | D3) PHF1    | E3) SMN*        | F3) MTF2     | G3) TRIM24     |
| A4) TDRD1-3     | B4) TDRD5   | C4) TDRD11   | D4) PHF19   | E4) SPF30       | F4) PHF1*    | G4) CHD5(1-2)' |
| A5) TDRD1-4     | B5) TDRD6-5 | C5) TDRD12-1 | D5) PHF20   | E5) UHRF1       | TUDOR        | CHROMO+PHD     |
| A6) TDRD2       | B6) TDRD6-6 | C6) ARID4A   | D6) PHF20-2 | E6) ZFPAT       | F5) Pomb1*   | G5) CHD3       |
| A7) TDRD3       | B7) TDRD6-7 | C7) ARID4B   | D7) PHF20L1 | E7) JMJ20A(1-2) | F6) Spind11* | G6) CHD4       |
|                 |             |              |             |                 | F7) TDRKH*   | G7) CHD5       |

  

| CHROMO    | CHROMO        | CHROMO   | CHROMO        | AGENET      | IDCL              | BRCMO            |
|-----------|---------------|----------|---------------|-------------|-------------------|------------------|
| H1) ARD4A | I1) HP1a/CBX5 | J1) CHD1 | K1) MPP8      | L1) FMR1    | M1) PCNA          | N1) SP140*       |
| H2) ARD4B | I2) HP1b      | J2) CHD2 | K2) MRG15     | L2) FXR1    | M2) LMNB1(1-3)    | N2) BRD4(1)'     |
| H3) CBX2  | I3) HP1y/CBX3 | J3) CHD6 | K3) MYST1/MOF | L3) FXR2    | M3) LMNB1(1-3)'   | N3) WDR9(1-2)'   |
| H4) CBX4  | I4) CDY1      | J4) CHD7 | K4) SMARCC1   | L4) GILP    | M4) LMNB1L3       | N4) SMAP*        |
| H5) CBX6  | I5) CDYL1b    | J5) CHD8 | K5) SMARCC2   | L5) IKB FL* | M5) DNMT3A*       | N5) HEAT         |
| H6) CBX7  | I6) CDYL2     | J6) CHD9 | K6) SUV39H1   | L6) BAH     | M6) NSD1/PWWP+PHD | N6) N-CAPD3(5-6) |
| H7) MSL3  | I7) MSL3      | J7) TP60 | K7) SUV39H2   | L6) ORC1    | M7) ZCWPW1        |                  |

**C**

Methyl Domain Readers Array - BFA5

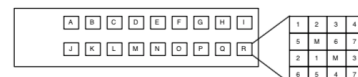

| TUDOR                        | TUDOR                          | TUDOR                         | TUDOR                     | TUDOR                     | TUDOR+PHD                       | PHD                      | TUDOR                        | T3H                 |
|------------------------------|--------------------------------|-------------------------------|---------------------------|---------------------------|---------------------------------|--------------------------|------------------------------|---------------------|
| A1) 53BP1(1-2) [NP_006448.1] | B1) TDRD4-1/NF17 [NP_112672.2] | C1) TDRD8 [NP_00147434.1]     | D1) AKAP1 [NP_003478.1]   | E1) SETD8 [NP_003035.1]   | F1) JMJ202/KDM4B [AA14289.1]    | G1) ING2 [NP_001555.1]   | H1) SGP29 [NP_013423.1]      | I1) VTHDC1 [D96M77] |
| A2) 53BP1(1-2) [NP_006448.1] | B2) TDRD4-3/NF17 [NP_112672.2] | C2) TDRD9 [NP_004975.2]       | D2) LER [NP_002636.4]     | D2) LER [NP_002636.4]     | F2) JMJ202C/KDM4C [NP_005976.2] | G2) TAF3 [NP_014128.1]   | H2) SPH1 [NP_008703.1]       | I2) VTHDC2 [D96M78] |
| A3) TDRD1-2 [NP_042936.1]    | B3) TDRD4-4/NF17 [NP_112672.2] | C3) TDRD10 [NP_0019146.1]     | D3) PHF1 [NM_002848.1]    | D3) PHF1 [NM_002848.1]    | F3) MTF2 [NP_0018764.1]         | G3) TRIM24 [NP_005827.1] | H3) TDRD2/DRH9 [NP_006853.2] | I3) VTHDC3 [D96M79] |
| A4) TDRD1-3 [NP_042936.1]    | B4) TDRD5 [NP_001804.1]        | C4) TDRD11 [NP_00140292.1]    | D4) PHF19 [NM_00128486.1] | D4) PHF19 [NM_00128486.1] | F4) PHF1* [NP_005827.1]         | G4) CHD5(1-2)'           | H4) LHM [NP_021036.1]        | I4) VTHDC4 [D96M80] |
| A5) TDRD1-4 [NP_042936.1]    | B5) TDRD6-5 [NP_001161.03.1]   | C5) TDRD12-1 [NP_001161.03.1] | D5) PHF20 [NP_007200.2]   | D5) PHF20 [NP_007200.2]   | F5) UHRF1 [NP_00161866.1]       | CHROMO+PHD               | H5) CYBB FL [NP_005596.1]    | I5) VTHDC5 [D96M81] |
| A6) TDRD2 [NP_006452.1]      | B6) TDRD6-6 [NP_001161.03.1]   | C6) ARID4A [NP_001453.1]      | D6) PHF20L1 [NP_007102.4] | D6) PHF20L1 [NP_007102.4] | F6) Spind11*                    | G5) CHD3 [NP_000271.2]   | H6) PIP2 FL [AA049476]       | I6) VTHDC6 [D96M82] |
| A7) TDRD3 [NP_010421.1]      | B7) TDRD6-7 [NP_001161.03.1]   | C7) ARID4B [NP_00119373.1]    | D7) PHF20L1 [NP_007102.4] | D7) PHF20L1 [NP_007102.4] | F7) TDRKH*                      | G6) CHD4 [NP_001264.2]   | H7) PIP2 FL [AA049476]       | I7) VTHDC7 [D96M83] |

  

| CHROMO                  | CHROMO                         | CHROMO                 | CHROMO                      | AGENET                 | IDCL                         | BRCMO                          | YEATS                         | HORMA               |
|-------------------------|--------------------------------|------------------------|-----------------------------|------------------------|------------------------------|--------------------------------|-------------------------------|---------------------|
| J1) ARD4A [NP_00383.3]  | I1) HP1a/CBX5 [NP_001130793.1] | L1) CHD1 [NP_001261.2] | M1) MPP8 [NP_005990.2]      | N1) FMR1 [NP_002015.1] | O1) PCNA [NP_007260.1]       | P1) SP140 [NP_009166.1]        | Q1) YEATS4G.A241 [NP_00521.1] | R1) HORMA1 [D96M24] |
| J2) ARD4B [NP_007484.4] | I2) HP1b [NP_003876.1]         | L2) CHD2 [NP_001262.2] | M2) MRG15 [NP_006762.1]     | N2) FXR1 [NP_002670.2] | O2) LMNB1(1-3) [NP_002293.4] | P2) BRD4(1)'                   | Q2) YEATS4G.A241 [NP_00521.1] | R2) HORMA2 [D96M25] |
| J3) CBX2 [NP_005163.1]  | I3) HP1y/CBX3 [NP_006027.2]    | L3) CHD6 [NP_011039.2] | M3) MYST1/MOF [NP_002003.2] | N3) FXR2 [NP_004601.2] | O3) LMNB1(1-3) [NP_002293.4] | P3) WDR9(1-2) [D96M56]'        | Q3) YEATS4G.A241 [NP_00521.1] | R3) HORMA3 [D96M26] |
| J4) CBX4 [NP_005167.2]  | I4) CDY1 [NP_00384.1]          | L4) CHD7 [NP_016410.1] | M4) SMARCC1 [NP_003966.2]   | N4) GILP [NP_007003.4] | O4) LMNB1L3 [NP_005297.1]    | P4) SMAP*                      | Q4) YEATS2 [NP_00609.1]       | R4) HORMA4 [D96M27] |
| J5) CBX6 [NP_005169.1]  | I5) CDYL1b [AA02872.1]         | L5) CHD8 [NP_014410.1] | M5) SMARCC2 [NP_003966.2]   | N5) IKB FL*            | O5) DNMT3A*                  | P5) N-CAPD3(5-6) [NP_005876.1] | Q5) YEATS2 [NP_00609.1]       | R5) HORMA5 [D96M28] |
| J6) CBX7 [NP_005170.1]  | I6) CDYL2 [NP_00384.1]         | L6) CHD9 [NP_014410.1] | M6) SUV39H1 [NP_003966.2]   | N6) BAH                | O6) NSD1/PWWP+PHD [D96M73]'  | P6) N-CAPD3(5-6) [NP_005876.1] | Q6) YEATS2 [NP_00609.1]       | R6) HORMA6 [D96M29] |
| J7) MSL3 [NP_005702.1]  | I7) MSL3 [NP_00384.1]          | L7) TP60 [NP_007436.1] | M7) SUV39H2 [NP_003966.2]   | N7) FMR1 [D96M78.1]    | O7) NSD1/PWWP+PHD [D96M73]'  | P7) ZCWPW1 [NP_004854.1]       | Q7) YEATS2 [NP_00609.1]       | R7) HORMA7 [D96M30] |

**Figure 3. Reader Domain Protein Microarray Selectivity Data Comparison with Biotinylated Compounds.**

**Related to Figure 1. A.** Protein microarray data for UNC4195 (top) and UNC5355 (bottom) with bound proteins highlighted in teal and yellow boxes. **B.** Complete list of histone reader domains evaluated on the protein microarray screened against UNC4195. Mapping of individual reader domains is described by the legend in the top right corner. **C.** Complete list of histone reader domains evaluated on the protein microarray screened against UNC5355. Mapping of individual reader domains is described by the legend in the top right corner. Boxes A-G and J-P are identical to the microarray described in **(B)**, additional domains screened against UNC5355 but not UNC4195 are described in boxes H, I, Q and R.

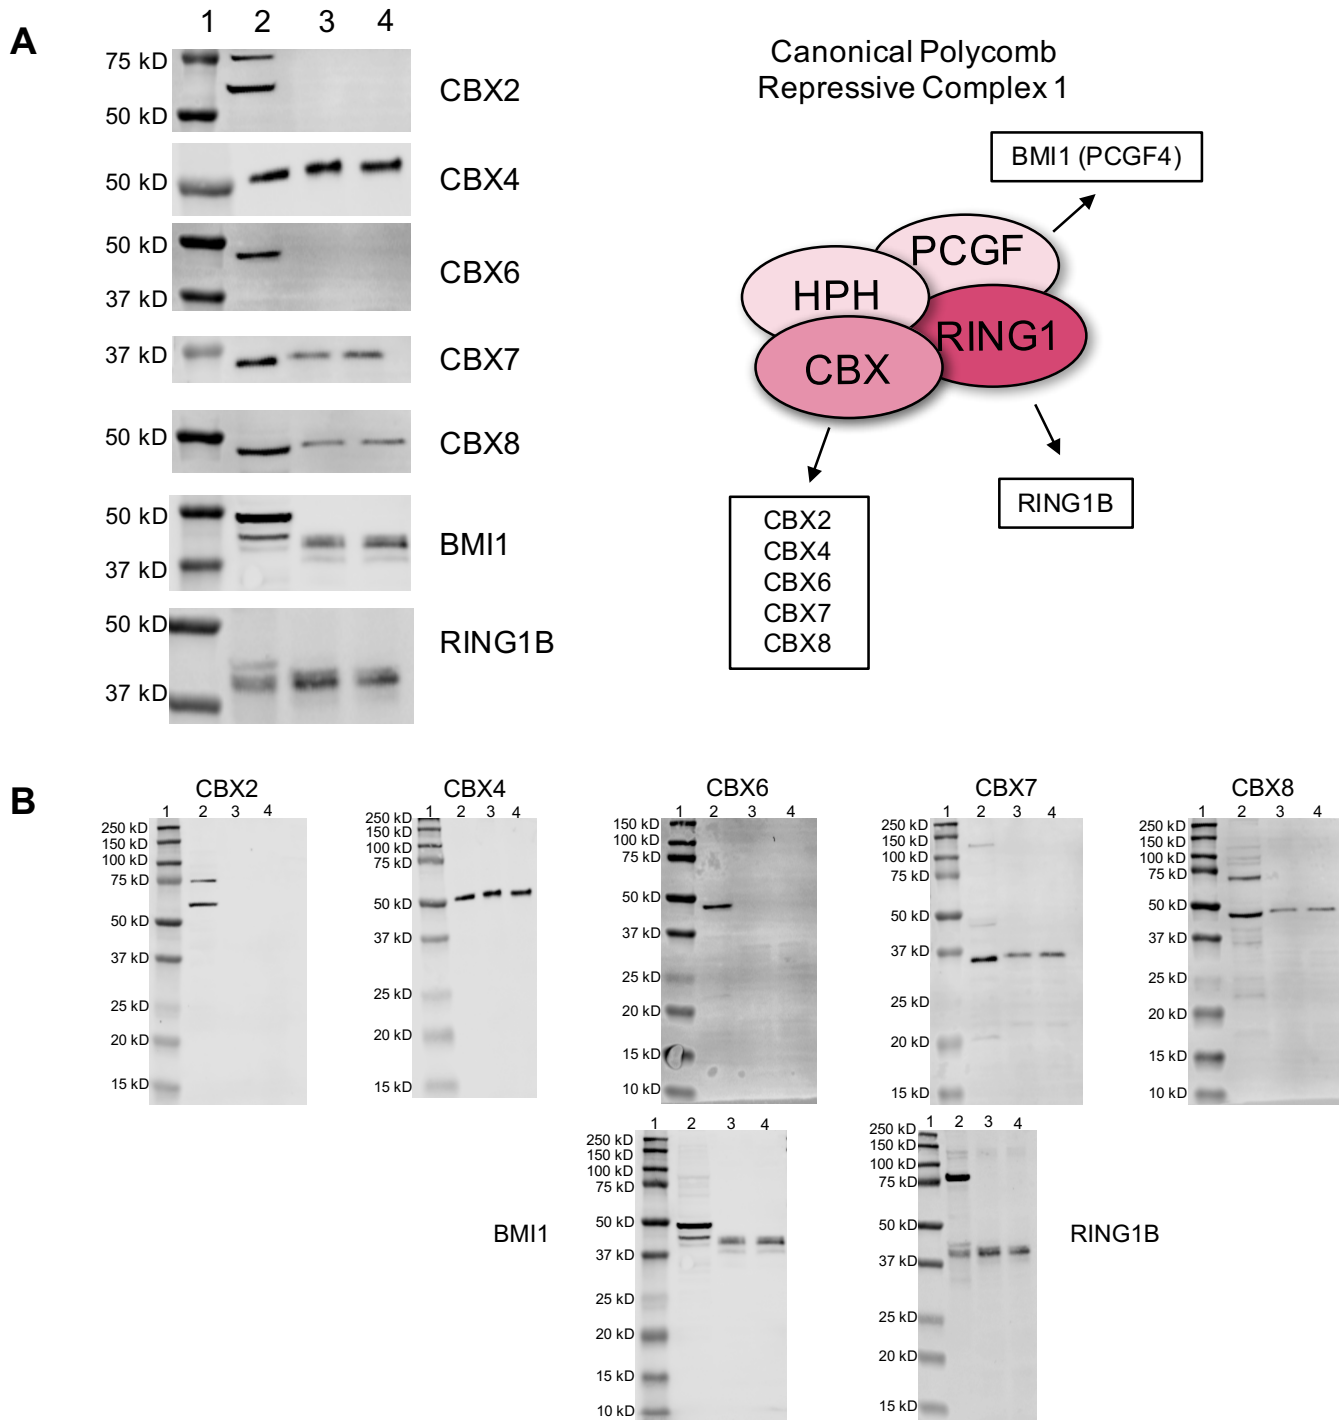

**Figure 4. PC3 Lysate Pulldown Experiments with UNC4195 and UNC5355 Biotinylated Ligands. Related to Figure 1. A.** (Left) Cropped blots highlighting bands of interest from PC3 lysate pulldowns with biotinylated ligands. (Right) Canonical PRC1 complex, with immunoblotted subunits listed. **B.** Uncropped western blots for individual proteins. For all blots in **A** and **B**, Lane 1= BioRad Precision Plus Protein Dual Color Standards (#1610374), Lane 2= PC3 Lysate Input, Lane 3= UNC4195 pulldown, and Lane 4= UNC5355 pulldown. Western blots shown are representative of three replicate experiments.



**A**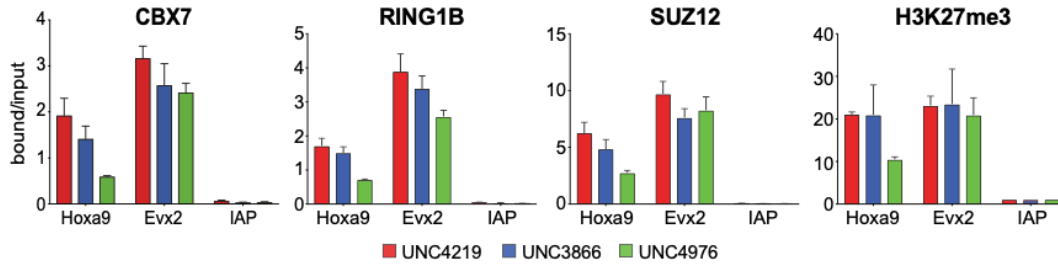**B**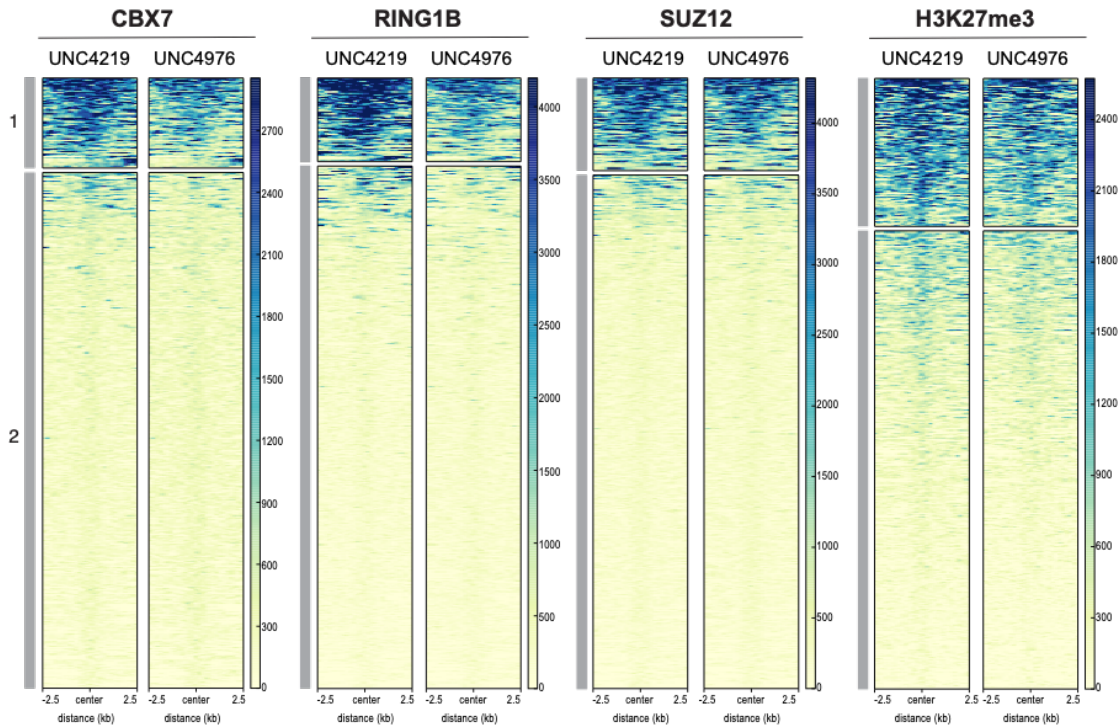**C**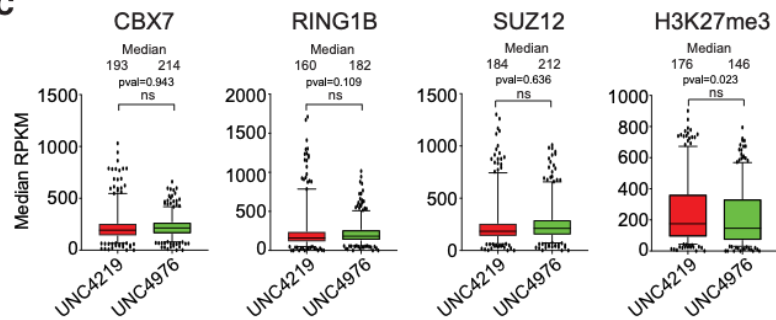**D**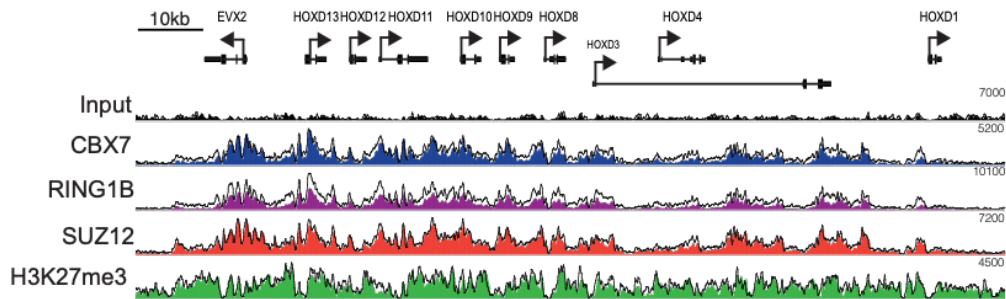

**Figure 5. UNC4976 efficiently displaces CBX-containing PRC1 from Polycomb target genes. Related to Figure 3. A.** ChIP-qPCR analysis shows relative enrichment of CBX7, RING1B, SUZ12 and H3K27me3 at selected genes in mES cells treated for 4hrs with 20  $\mu$ M of control compound UNC4219 (red), UNC3866 (blue) or UNC4976 (green). IAP serves as negative control. Analysis of H3K27me3 is normalized to IAP. Data are presented as mean  $\pm$  SD from at least two replicate experiments. **B.** Heat maps showing enrichment of capture ChIP-seq for CBX7, RING1B, SUZ12 and H3K27me3 in mES cells treated for 4hrs with 20  $\mu$ M of control compound UNC4219 or UNC4976. Signal is centered around peaks  $\pm$  2.5 kb and plotted as FPKM normalized mapped reads and separated into “high” (1) and “low” (2) clusters. **C.** Boxplots of heat maps from capture ChIP-seq (**B**) show median RPKM normalized mapped reads of CBX7, RING1B, SUZ12 and H3K27me3 in “low” cluster (2). Statistical significance was calculated using unpaired t-test ( $p$ val<0.01). **D.** Screenshots of capture ChIP-seq enrichment at HoxD cluster for RING1B, CBX7, SUZ12 and H3K27me3. Capture ChIP-seq signal of control UNC4219 treatment is shown as an outlined line and UNC4976-treated capture ChIP-seq samples are shown in filled color tracks. All data in A-D are representative of at least two independent biological replicates.

| ChIP-qPCR Primer Sequences |                           |                        |
|----------------------------|---------------------------|------------------------|
| Gene                       | Forward Sequence          | Reverse Sequence       |
| HoxA9                      | GGATAATCGCCTAGGTGTGACTTAG | CATCTCTTCTTGCCTCTCTGGG |
| Evx2                       | CGCAGCCCATCATTAAGAC       | CGGACAAACTGGAGAACCTC   |
| IAP                        | CTCCATGTGCTCTGCCTTCC      | CCCCGTCCCTTTTTTAGGAGA  |

**Table 3. ChIP-qPCR Primer Sequences. Related to Figure 3.** Primer sequences for select Polycomb target genes used for ChIP-qPCR.

| <b>Capture-ChIP-seq Capture Probe Sequences</b> |           |           |                                         |                     |    |                              |
|-------------------------------------------------|-----------|-----------|-----------------------------------------|---------------------|----|------------------------------|
| <b>Baits mm9 G11D genome</b>                    |           |           | <b>25 regions</b>                       | <b>genomic size</b> |    | <b>Polycomb target genes</b> |
| <b>chr1</b>                                     | 4460681   | 4511256   | <b>Sox17</b>                            | 51                  | kb | y                            |
| <b>chr1</b>                                     | 17995977  | 18046157  | <b>Intergenic Crisp4</b>                | 50                  | kb | m                            |
| <b>chr2</b>                                     | 74450084  | 74651064  | <b>Hoxd cluster</b>                     | 201                 | kb | y                            |
| <b>chr2</b>                                     | 105488775 | 105539252 | <b>Pax6</b>                             | 50                  | kb | y                            |
| <b>chr2</b>                                     | 153432137 | 153522909 | <b>Commd7&amp;Dnmt3b</b>                | 91                  | kb | n                            |
| <b>chr3</b>                                     | 34537459  | 34568988  | <b>Sox2</b>                             | 32                  | kb | n                            |
| <b>chr3</b>                                     | 87931198  | 88031358  | <b>Mef2d</b>                            | 100                 | kb | y                            |
| <b>chr3</b>                                     | 127332802 | 127342995 | <b>Neurog2</b>                          | 10                  | kb | y                            |
| <b>chr4</b>                                     | 88905858  | 88962573  | <b>Cdkn2a&amp;b&amp;Gm12610</b>         | 57                  | kb | y                            |
| <b>chr4</b>                                     | 124294578 | 124395096 | <b>Pou3f1</b>                           | 101                 | kb | y                            |
| <b>chr5</b>                                     | 98563339  | 98814815  | <b>Prdm8&amp;Fgf5&amp;1700007G11Rik</b> | 251                 | kb | y                            |
| <b>chr5</b>                                     | 120094791 | 120194420 | <b>Tbx3</b>                             | 100                 | kb | n                            |
| <b>chr6</b>                                     | 122642090 | 122677539 | <b>Nanog</b>                            | 35                  | kb | n                            |
| <b>chr7</b>                                     | 110957144 | 111008233 | <b>Hbb locus</b>                        | 51                  | kb | n                            |
| <b>chr7</b>                                     | 137983359 | 138081333 | <b>Plekha1&amp;Htra1</b>                | 98                  | kb | n/m                          |
| <b>chr7</b>                                     | 149758083 | 149858985 | <b>Igf2&amp;H19</b>                     | 101                 | kb | y                            |
| <b>chr8</b>                                     | 44361316  | 44426512  | <b>Zfp42</b>                            | 65                  | kb | n                            |
| <b>chr9</b>                                     | 89592758  | 89602918  | <b>Tmed3</b>                            | 10                  | kb | n                            |
| <b>chr11</b>                                    | 118870869 | 118961636 | <b>Cbx2/4/8</b>                         | 91                  | kb | y                            |
| <b>chr12</b>                                    | 87761185  | 87877500  | <b>Esrrb</b>                            | 116                 | kb | y                            |
| <b>chr14</b>                                    | 49256167  | 49306303  | <b>Otx2</b>                             | 50                  | kb | y                            |
| <b>chr15</b>                                    | 78819673  | 78905009  | <b>G11D locus</b>                       | 85                  | kb | n                            |
| <b>chr16</b>                                    | 91199329  | 91300463  | <b>Olig1&amp;2</b>                      | 101                 | kb | y                            |
| <b>chr17</b>                                    | 35623948  | 35666758  | <b>Oct4/Pouf51 locus</b>                | 43                  | kb | n                            |
| <b>chr17</b>                                    | 50414245  | 50444405  | <b>Dazl</b>                             | 30                  | kb | n                            |

**Table 4. Capture-ChIP-seq Probe Sequences. Related to Figure 3.** Probe sequences for select Polycomb target genes used for Capture-ChIP-seq.

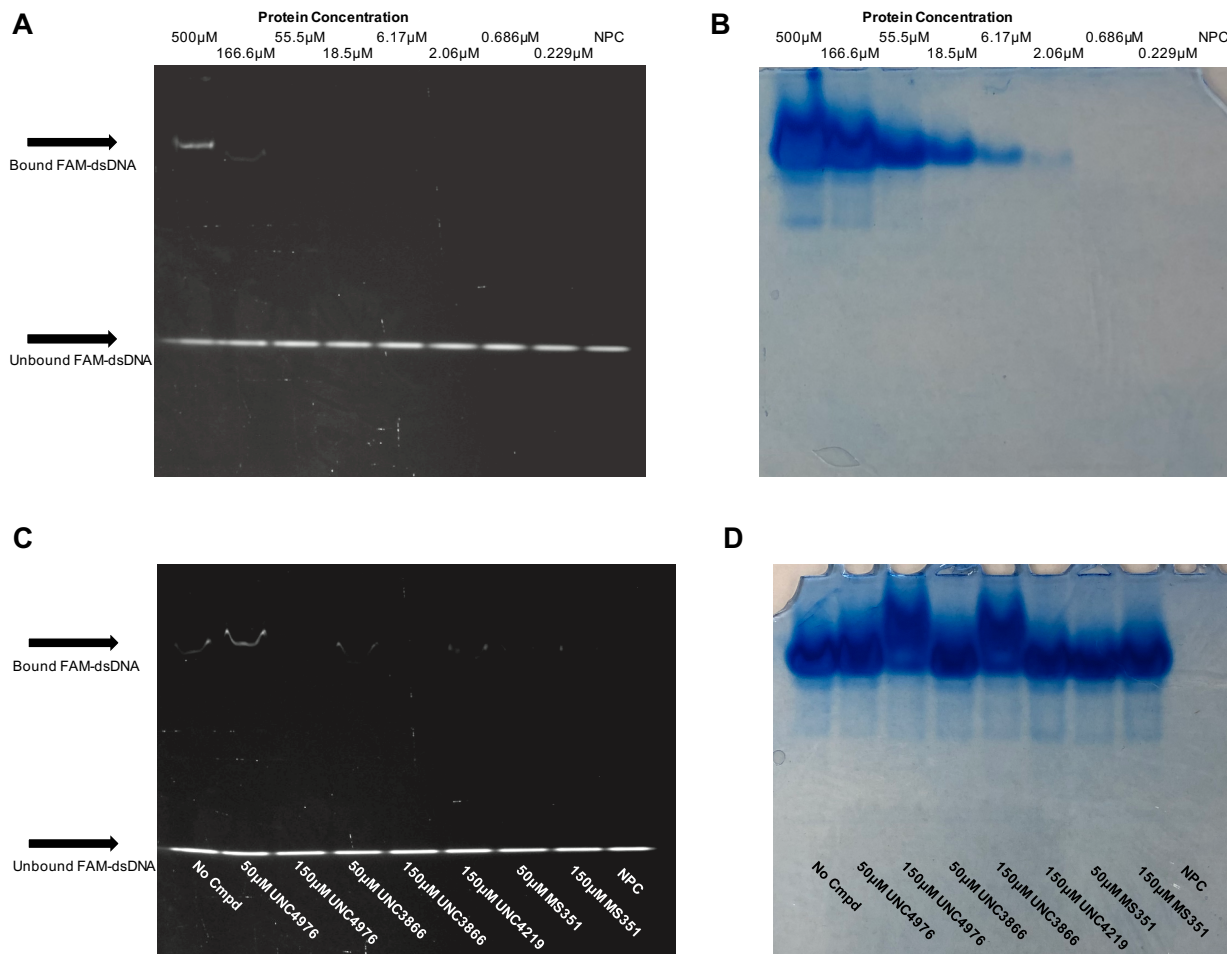

**Figure 6. Electrophoretic Mobility Shift Assay (EMSA). Related to Figure 4. A.** Fluorescent image of EMSA protein titration of CBX7 chromodomain with 100nM of FAM-dsDNA, demonstrating that CBX7 weakly binds FAM-dsDNA at 166  $\mu$ M. **B.** Follow up Coomassie staining of Tris-Glycine gel from **A**, demonstrating protein titration of CBX7 chromodomain. **C.** Fluorescent image of EMSA demonstrating that UNC4976 enhances the ability of CBX7 chromodomain to bind to FAM-dsDNA at a 1:3 ratio of compound to protein. All compounds were tested at either 1:3 or 1:1 ratios of compound to protein. **D.** Follow up Coomassie staining of Tris-Glycine gel from **C**, demonstrating that only UNC4976 and UNC3866 bind to CBX7 chromodomain as indicated by band shift. Images are representative of three replicate experiments.

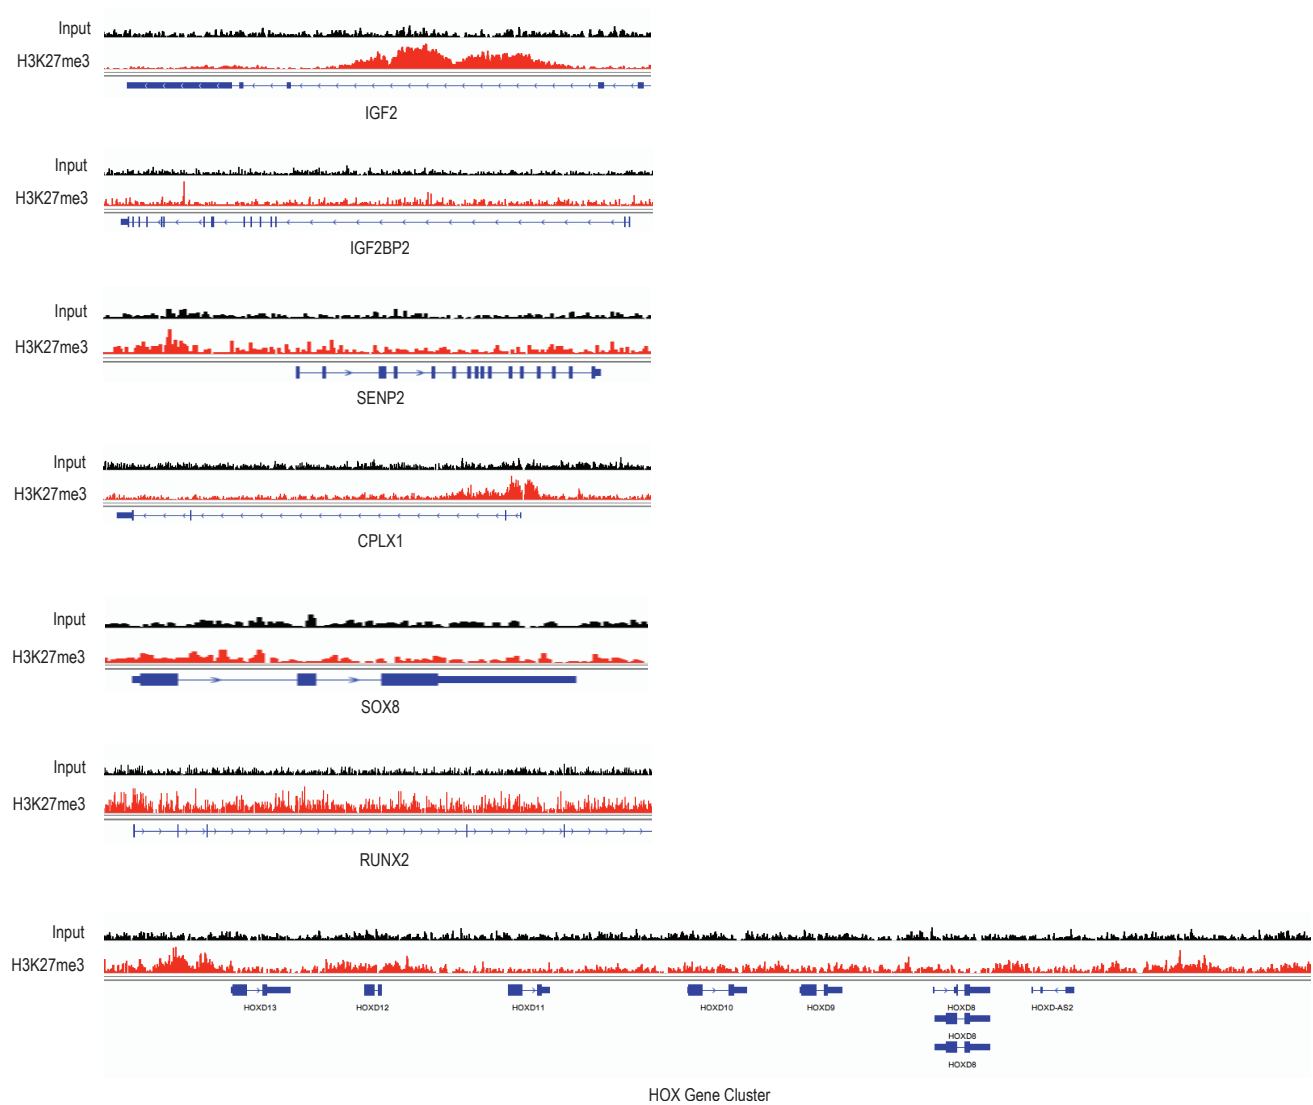

**Figure 7. HEK293 Cells H3K27me3 ChIP-seq Data. Related to Figure 6.** IGV Views showing H3K27me3 ChIP-seq signals from HEK293 cells (GEO: GSE133391) identifying PRC1 targets that were examined by RT-qPCR.

| HEK293 RT-qPCR Primer Sequences |                         |                         |
|---------------------------------|-------------------------|-------------------------|
| Gene                            | Forward Sequence        | Reverse Sequence        |
| GAPDH                           | AACATCATCCCTGCCTCTACTGG | GTTTTTCTAGACGGCAGGTCAGG |
| HOXA1                           | CCAGCCACCAAGAAGCCTGT    | CCAGTTCCGTGAGCTGCTTG    |
| HOXA4                           | CGTGGTGTACCCCTGGATGA    | AAGACCTGCTGCCGGGTGTA    |
| HOXC13                          | TCATCCCCGTCGAAGGCTAC    | TGTAGGGCACGCGTTTCTTG    |
| HOXD9                           | GGCTGTTCGCTGAAGGAGGA    | TCTCCAGCTCAAGCGTCTGGT   |
| CPLX1                           | GTGTGAGTTCTGACCCCTGG    | TCTGGGTCCCTTCTCCTCGTC   |
| SOX8                            | GAGCTTGGCAACCGAAAACC    | TGCTTCCCAAACCCCAAACCT   |
| RUNX2                           | CGCCTCACAAACAACCACAG    | GACTCTGTTGGTCTCGGTGG    |
| CEBPD                           | CAACCAGGAGATGCAGCAGA    | CAGCTGCTTGAAGAACTGCC    |
| IGF2                            | AGTCGTGGCTCTCCATCTTG    | CAGGCACAGGTGACATTGAG    |
| IGFBP2                          | AAAACGGAGAGTGCTTGGGT    | AGCAAGAAGGAGCAGGTGTG    |

**Table 5. RT-qPCR Primer Sequences. Related to Figure 6.** Primer sequences for select Polycomb target genes used for RT-qPCR in HEK293 cells.
